# Supplementary material for: A fluorescence assay for the trace detection of protamine and heparin
Source: Royal Society of Chemistry journal article supplement (doi:10.1039/c4ra02936d), 2014-01-01
Supplement: c4ra02936d1.pdf [file c4ra02936d1.pdf]

## Electronic Supplementary Material

### A fluorescence assay for the trace detection of protamine and heparin

Shu Pang, Siyu Liu, Xingguang Su\*

*Department of Analytical Chemistry, College of Chemistry, Jilin University, Changchun, 130012,*

*China*

\*Corresponding author

*E-mail: [suxg@jlu.edu.cn](mailto:suxg@jlu.edu.cn)*

*Tel.: +86 431 85168352*

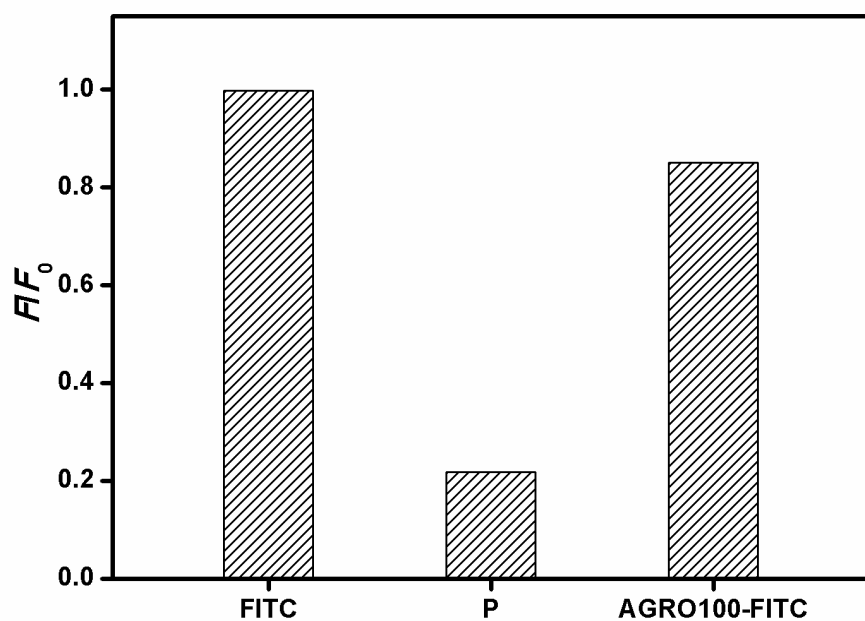

1  
2 **Fig. S1** The fluorescence quenching ratio of FITC dye, FITC-labeled ssDNA sequence (**P**) and FITC-labeled  
3 AGRO100 sequence in the presence of protamine (15 ng/mL).  $F$  and  $F_0$  were the fluorescence intensity of FITC  
4 dye, FITC-labeled ssDNA sequence (**P**) and FITC-labeled AGRO100 sequence in the presence and absence of  
5 protamine, respectively.

6

7

8

9

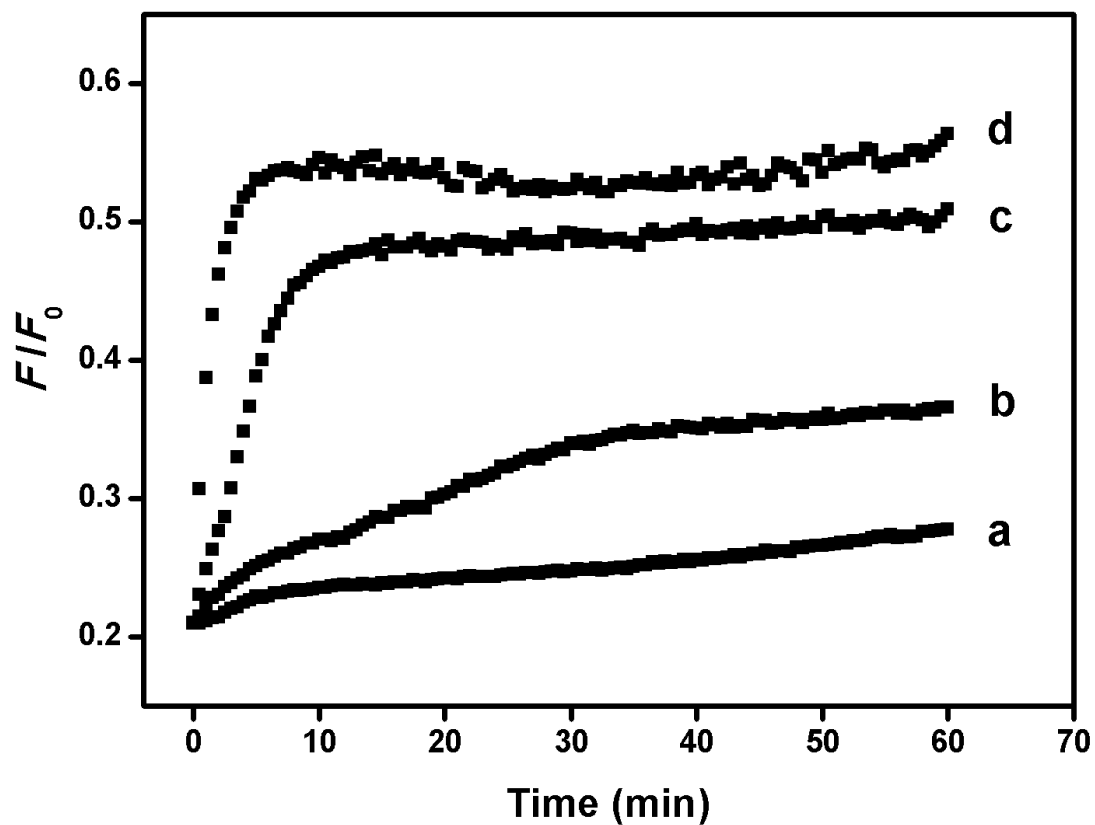

1  
2 **Fig. S2** Fluorescence intensity changes of **P** in the presence of different concentrations of trypsin (a. 62.5 ng/mL, b.  
3 125 ng/mL, c. 625 ng/mL, d. 1.875 µg/mL) with different incubation time. Conditions: Tris-HCl buffer (20  
4 mmol/L, pH 8.2), 3.75 nmol/L **P** and 15 ng/mL protamine, 5 min for fluorescence quenching before the addition of  
5 trypsin.  $F_0$  was the original fluorescence intensity of **P**, and  $F$  was the fluorescence intensity of **P** in the presence of  
6 trypsin and protamine, respectively.

7

8

9

10

11

12

13

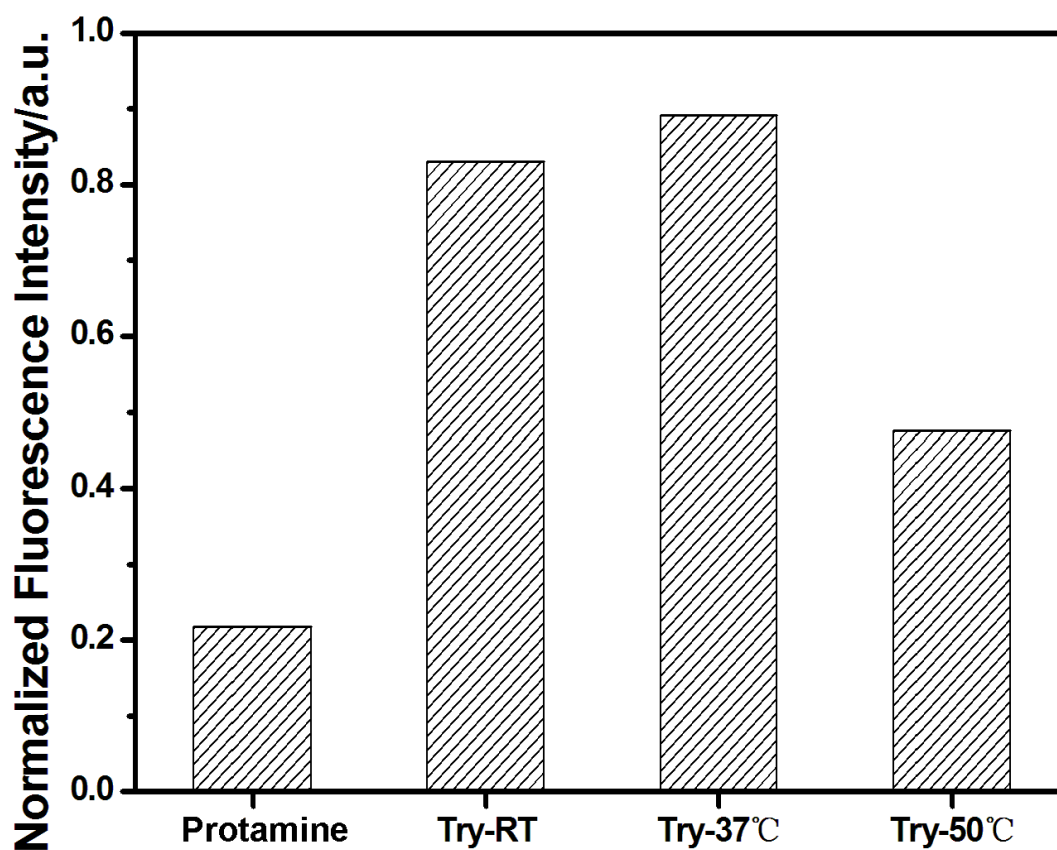

1  
2 **Fig. S3** The effect of temperature on the hydrolysis catalyzed by trypsin. The columns respectively represent the  
3 fluorescence of probe **P** quenched by 15 ng/mL protamine and probe **P** quenched by 15 ng/mL protamine  
4 incubated with 1.875  $\mu\text{g/mL}$  trypsin for 1 hour at different temperature (Room temperature, 37°C, 50°C).

5

6

7

8

9

10

11

12

13

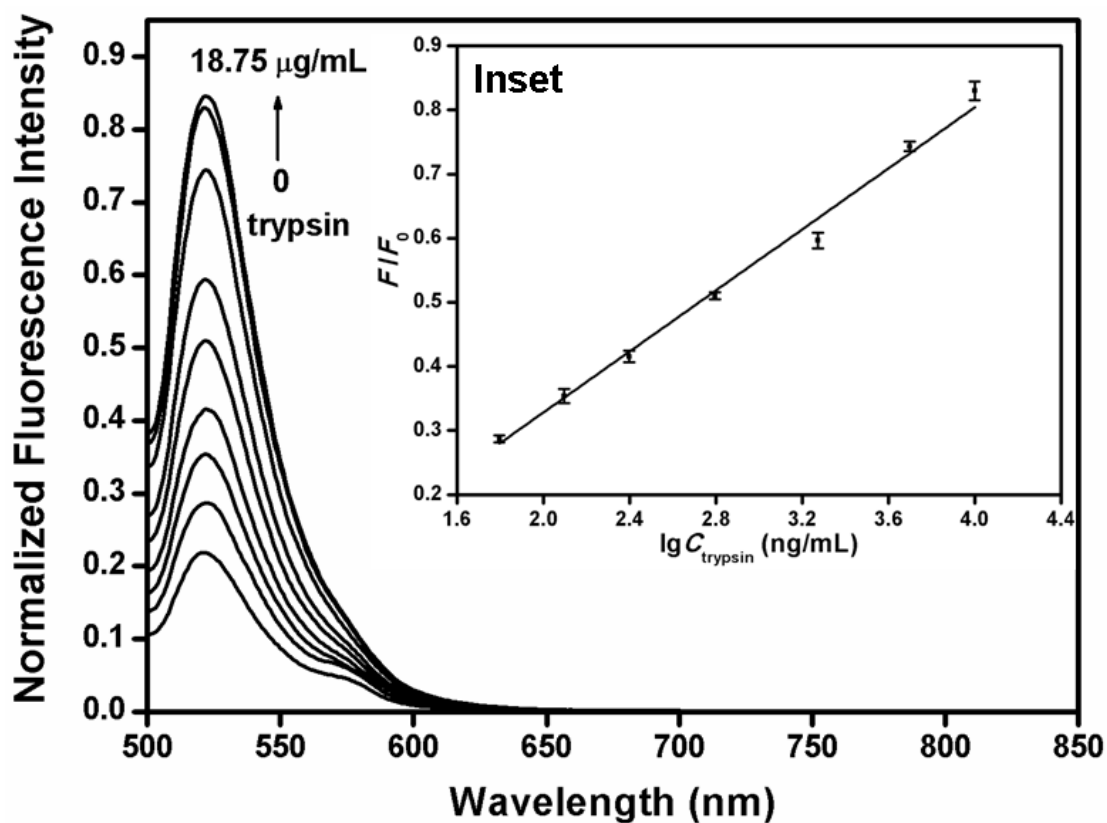

1  
2 Fig. S4 The fluorescence spectra of P and protamine in the presence of different concentrations of trypsin (0,  
3 0.0625, 0.125, 0.25, 0.625, 1.875, 5, 10, 18.75  $\mu\text{g/mL}$ ). The inset shows the relationship between  $F/F_0$  and the  
4 concentration of trypsin. Conditions: Tris-HCl buffer (20 mmol/L, pH 8.2), 3.75 nmol/L P and 15 ng/mL  
5 protamine, 5 min for fluorescence quenching and 1 h for hydrolysis.  $F_0$  was the original fluorescence intensity of P,  
6 and  $F$  was the fluorescence intensity of P in the presence of trypsin and protamine, respectively.

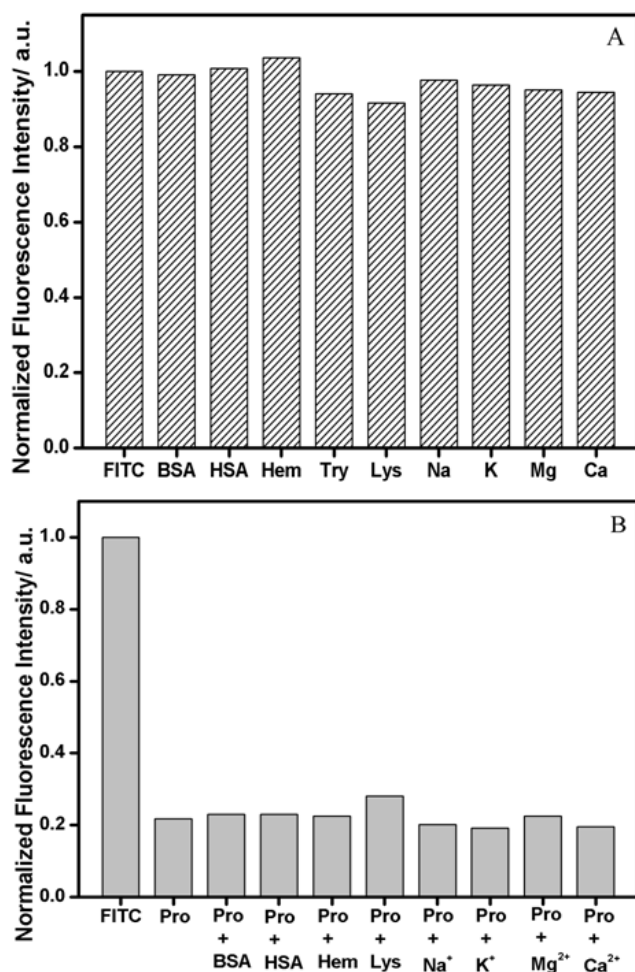

1

2 **Fig. S5** (A) The effect of coexisting substances (BSA 5  $\mu\text{g/mL}$ , HSA 5  $\mu\text{g/mL}$ , hemoglobin 2.5  $\mu\text{g/mL}$ , Trypsin 5  
3  $\mu\text{g/mL}$ , Lysozyme 30  $\text{ng/mL}$ , NaCl 5  $\mu\text{g/mL}$ , KCl 5  $\mu\text{g/mL}$ ,  $\text{MgCl}_2$  5  $\mu\text{g/mL}$ ,  $\text{Ca(NO}_3)_2$  5  $\mu\text{g/mL}$ ) on the  
4 fluorescence intensity of **P**. (B) The effect of coexisting substances (BSA 5  $\mu\text{g/mL}$ , HSA 5  $\mu\text{g/mL}$ , hemoglobin 2.5  
5  $\mu\text{g/mL}$ , Lysozyme 30  $\text{ng/mL}$ , NaCl 5  $\mu\text{g/mL}$ , KCl 5  $\mu\text{g/mL}$ ,  $\text{MgCl}_2$  5  $\mu\text{g/mL}$ ,  $\text{Ca(NO}_3)_2$  5  $\mu\text{g/mL}$ ) on the  
6 fluorescence intensity of **P** in the presence of protamine. Conditions: Tris-HCl buffer (20  $\text{mmol/L}$ , pH 8.2), 3.75  
7  $\text{nmol/L}$  **P** and 15  $\text{ng/mL}$  protamine, 5 min for fluorescence quenching.

8

9

10

11

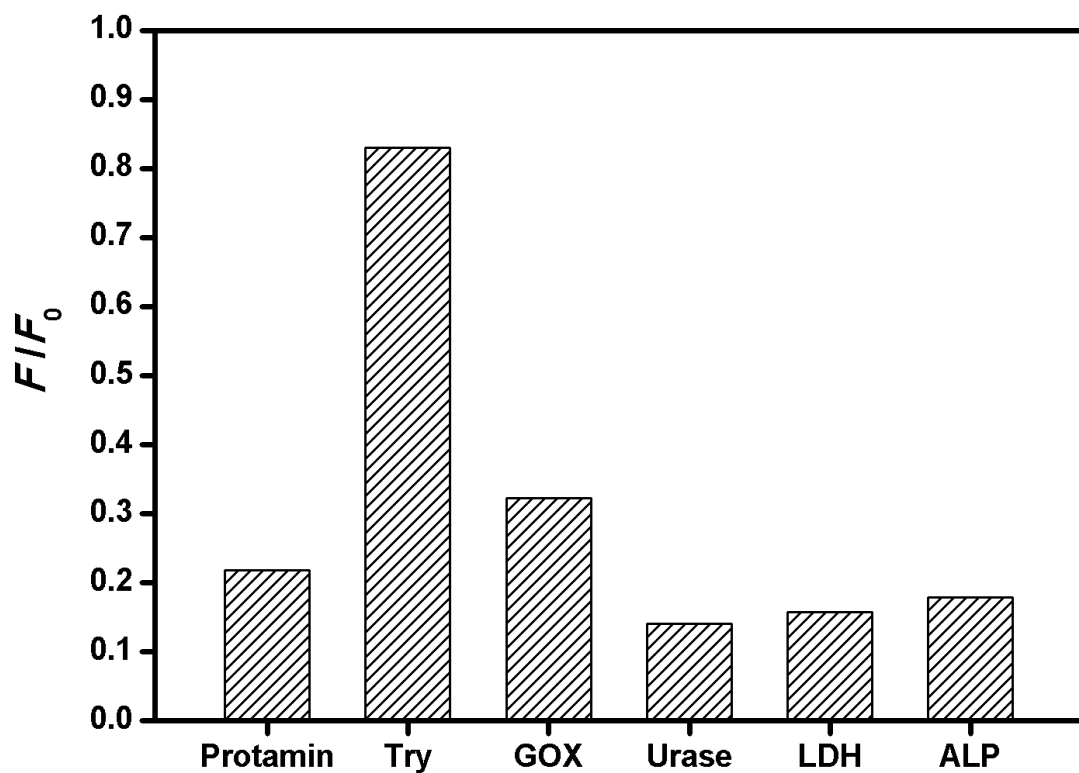

1  
2 **Fig. S6** Study on the effect of different emzymes (trypsin 10  $\mu\text{g/mL}$ , GOX 25  $\mu\text{g/mL}$ , urease 25  $\mu\text{g/mL}$ , LDH 25  
3  $\mu\text{g/mL}$ , ALP 25  $\mu\text{g/mL}$ ) on the detection process. Conditions: Tris-HCl buffer (20 mmol/L, pH 8.2), 3.75 nmol/L **P**  
4 and 15 ng/mL protamine, 5 min for fluorescence quenching and 1 h for hydrolysis.  $F_0$  was the original  
5 fluorescence intensity of **P**, and  $F$  was the fluorescence intensity of **P** in the presence of enzymes and protamine,  
6 respectively.
